# Supplementary material for: First Report of Extended-Spectrum β-Lactamase (blaCTX-M1) and Colistin Resistance Gene mcr-1 in E. coli of Lineage ST648 from Cockroaches in Tunisia
Source: PubMed Central journal article supplement (PMC9045256; doi:10.1128/spectrum.00036-21), 2022-03-01
Supplement: spectrum00036-21_supp_1_seq3.pdf [file spectrum00036-21_supp_1_seq3.pdf]

**Table S1: Allelic combinations of sequence types (ST) and their Genbank accession numbers**

| Strains                  | Sequence Types             | Combinations of alleles    |                            |                            |                            |                            |                            |                            |
|--------------------------|----------------------------|----------------------------|----------------------------|----------------------------|----------------------------|----------------------------|----------------------------|----------------------------|
| <i>E. coli</i>           |                            | <i>adk</i>                 | <i>fumC</i>                | <i>gurB</i>                | <i>icd</i>                 | <i>mdh</i>                 | <i>purA</i>                | <i>recA</i>                |
|                          | <b>ST648</b>               | 92                         | 4                          | 87                         | 96                         | 70                         | 58                         | 2                          |
|                          | Genbank accession number   | <a href="#">MZ346383.1</a> | <a href="#">MW519917.1</a> | <a href="#">MF381225.1</a> | <a href="#">MF381234.1</a> | <a href="#">MH561342.1</a> | <a href="#">MZ346152.1</a> | <a href="#">KM072943.1</a> |
|                          | <b>ST8149</b>              | 64                         | 11                         | 5                          | 8                          | 693                        | 8                          | 35                         |
|                          | Genbank accession number   | <a href="#">LC187169.1</a> | <a href="#">MW557688.1</a> | <a href="#">MW519952.1</a> | <a href="#">MW557701.1</a> | <a href="#">MN315061.1</a> | <a href="#">KM072796.1</a> | <a href="#">AB648888.1</a> |
|                          | <b>ST2914</b>              | 34                         | 36                         | 207                        | 87                         | 67                         | 16                         | 4                          |
|                          | Genbank accession number   | <a href="#">KF914279.1</a> | <a href="#">MH561275.1</a> | <a href="#">MG194495.1</a> | <a href="#">LC187109.1</a> | <a href="#">MG204771.1</a> | <a href="#">LC187111.1</a> | <a href="#">MH561375.1</a> |
|                          | <b>ST155</b>               | 6                          | 4                          | 14                         | 16                         | 24                         | 8                          | 14                         |
|                          | Genbank accession number   | <a href="#">MW519923.1</a> | <a href="#">MW519917.1</a> | <a href="#">MN529017.1</a> | <a href="#">MW557695.1</a> | <a href="#">MN315063.1</a> | <a href="#">KM072796.1</a> | <a href="#">MN315096.1</a> |
|                          | <b>ST23</b>                | 6                          | 4                          | 12                         | 1                          | 20                         | 13                         | 7                          |
| Genbank accession number | <a href="#">MW519923.1</a> | <a href="#">MW519917.1</a> | <a href="#">MN315005.1</a> | <a href="#">MW519943.1</a> | <a href="#">MN529105.1</a> | <a href="#">MN315064.1</a> | <a href="#">OU342919.1</a> |                            |
| <i>K. pneumoniae</i>     |                            | <i>gapA</i>                | <i>infB</i>                | <i>mdh</i>                 | <i>pgi</i>                 | <i>phoE</i>                | <i>rpoB</i>                | <i>tonB</i>                |
|                          | <b>ST2010</b>              | 17                         | 55                         | 39                         | 20                         | 243                        | 18                         | 156                        |
|                          | Genbank accession number   | <a href="#">HG933781.1</a> | <a href="#">LC049012.1</a> | <a href="#">AM051118.1</a> | <a href="#">LC049121.1</a> | <a href="#">KT270588.1</a> | <a href="#">MF345933.1</a> | <a href="#">FJ483747.1</a> |
|                          | <b>ST551</b>               | 3                          | 1                          | 1                          | 1                          | 9                          | 4                          | 135                        |
|                          | Genbank accession number   | <a href="#">LT615348.1</a> | <a href="#">AJ227992.1</a> | <a href="#">AJ890392.1</a> | <a href="#">AJ890402.1</a> | <a href="#">AJ890421.1</a> | <a href="#">MT882043.1</a> | <a href="#">AJ890491.1</a> |
